# Supplementary material for: Polypyrrole nanotubes–polyaniline composite for DNA detection using methylene blue as intercalator
Source: Royal Society of Chemistry journal article supplement (doi:10.1039/c2ay26127h), 2012-12-13
Supplement: c2ay26127h.pdf [file c2ay26127h.pdf]

## Supporting Information

### Polypyrrole nanotubes-polyaniline composite for DNA detection using methylene blue as intercalator

S. Radhakrishnan, C. Sumathi, V. Dharuman and J. Wilson

*Polymer Electronics Lab, Department of Bioelectronics and Biosensors, Alagappa University,  
Karaikudi-630 004, Tamilnadu, India.*

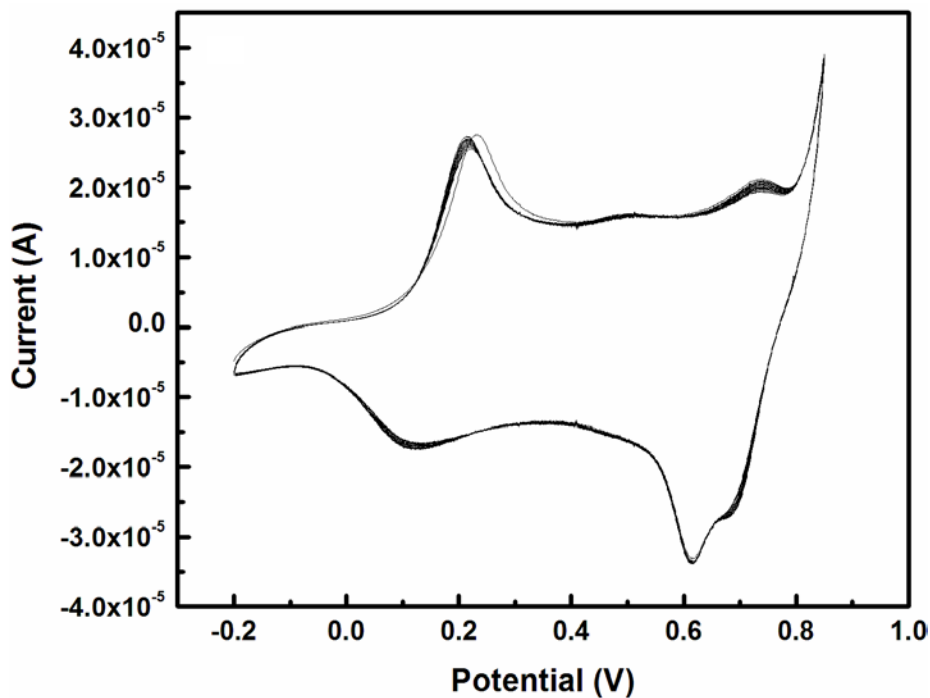

**Fig.S1** CV response of PPy-PANi modified Au electrode measured in 1M HCl in the potential window -0.2 to 0.8 V at a scan rate of 50 mV/s

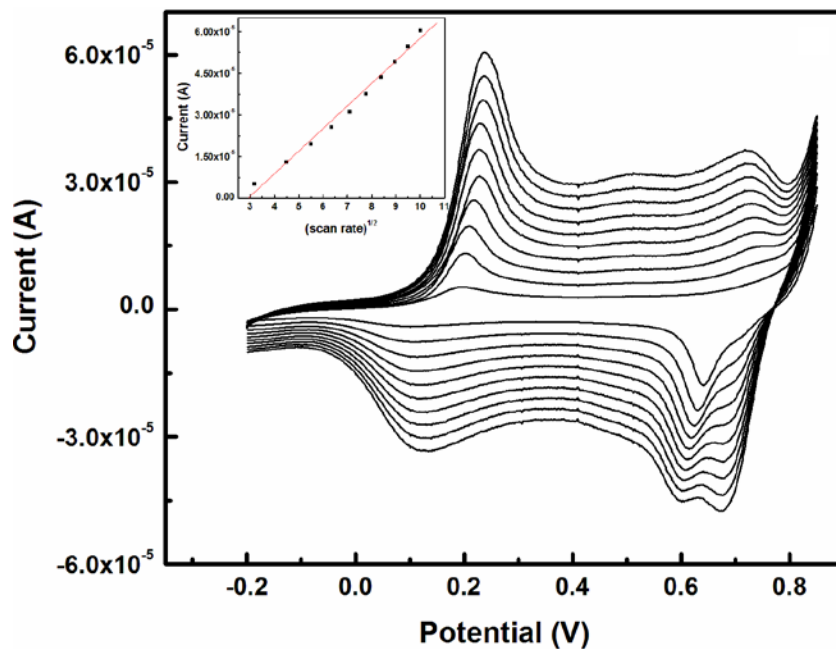

**Fig.S2** CV response of PPy-PANi modified Au electrode measured in 1M HCl in the potential window -0.2 to 0.8 V. Effect of scan rate (10- 100 mV/s) on PPy-PANi redox behavior in 1M HCl; (Inset shows the scan rate vs current graph).

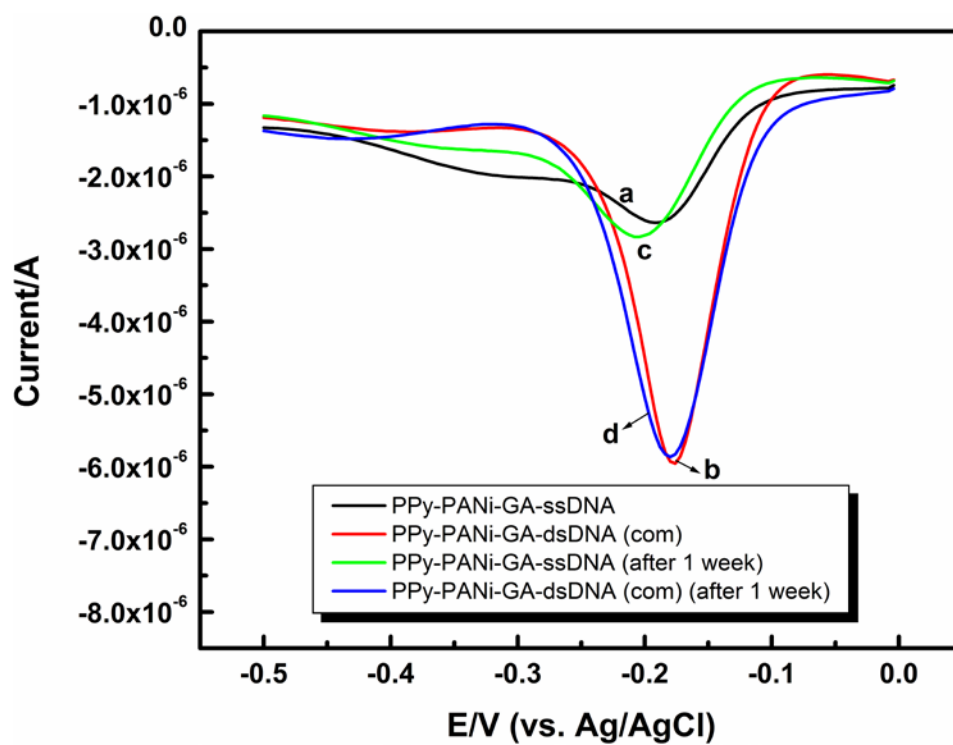

**Fig.S3** DPV response of PPy-PANi-GA-ssDNA modified electrode (a and c) and hybridized with complementary target DNA (b and d) measured in PB (pH 7.0) solution in the potential window -0.5 to 0.0 V.

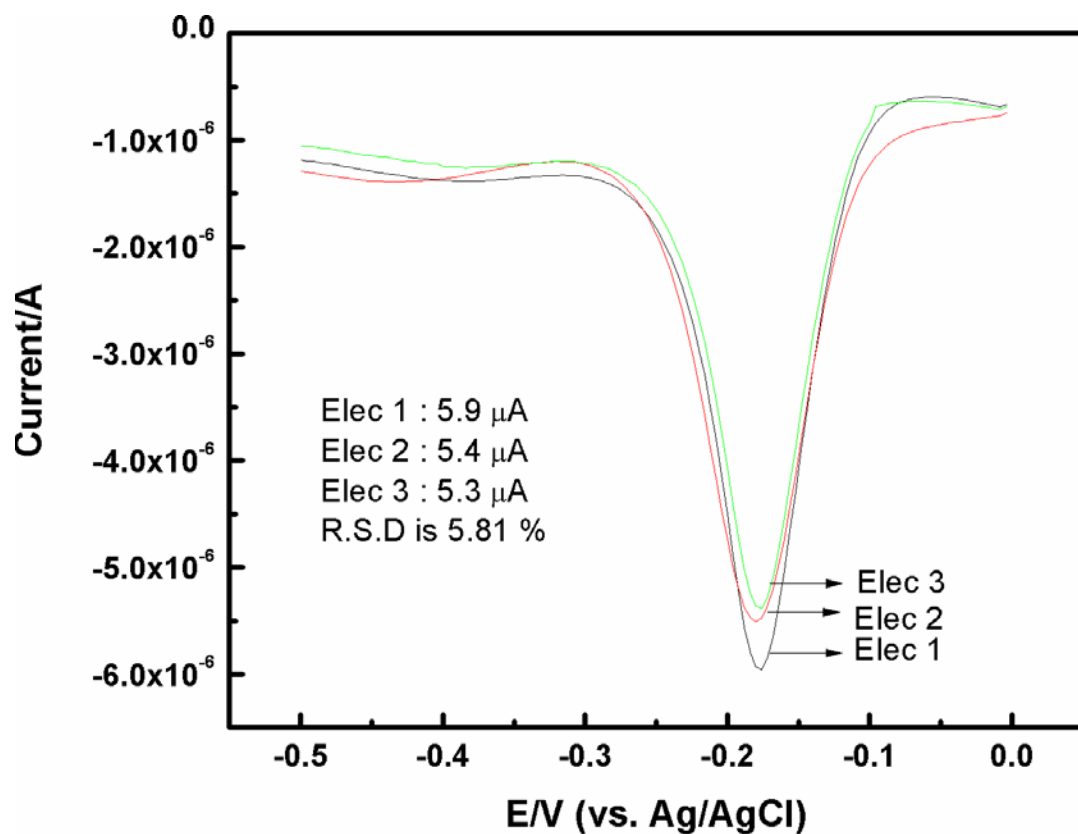

**Fig. S4** DPV response of PPy-PANi-GA-ssDNA modified three independent electrodes hybridized with complementary target DNA, measured in PB (pH 7.0) solution in the potential window -0.5 to 0.0 V.

**Supplementary Table S1** Impedance spectra (IS), cyclic voltammetry (CV) and differential pulse voltammetry (DPV) modification of Au electrode

| <b>Surfaces</b>   | <b><i>Electrochemical Parameters</i></b>       |                                |                  |                                |
|-------------------|------------------------------------------------|--------------------------------|------------------|--------------------------------|
|                   | <b>IS</b><br>$R_{CT} (\Omega \text{ cm}^{-2})$ | <b>CV</b><br>$\Delta E_P (mV)$ | $i_{pa} (\mu A)$ | <b>DPV</b><br>$i_{pc} (\mu A)$ |
| Bare Au           | 1078                                           | 80                             | 8.86             | 1.67                           |
| PPy-PANi          | 2618                                           | 120                            | 9.04             | 1.89                           |
| PPy-PANi-GA       | 6677                                           | 260                            | 8.40             | 2.15                           |
| PPy-PANi-GA-ssDNA | 12690                                          | 270                            | 5.50             | 2.60                           |
| PPy-PANi-GA-dsDNA | 15770                                          | 460                            | 5.38             | 6.00                           |

**Supplementary Table S2** The performance comparison of currently fabricated DNA biosensor with

| <b>Matrix for DNA immobilization</b> | <b>Detection techniques</b> | <b>Linear range (M)</b>                        | <b>Detection limit (M)</b> | <b>Reference</b>      |
|--------------------------------------|-----------------------------|------------------------------------------------|----------------------------|-----------------------|
| Au NP/PPAA/MWCNT                     | DPV                         | $9.0 \times 10^{-12}$ to $9.0 \times 10^{-9}$  | $3.2 \times 10^{-12}$      | Yuzhong et al., 2009  |
| Au NP/PANi                           | EIS                         | $3.1 \times 10^{-12}$ to $1.0 \times 10^{-6}$  | $3.1 \times 10^{-13}$      | Yuanyuan et al., 2008 |
| Au NP/PLL                            | CC                          | $1.0 \times 10^{-13}$ to $1.0 \times 10^{-11}$ | $3.5 \times 10^{-14}$      | Jie et al., 2010      |
| Au NP/HDT                            | DPV                         | $1.0 \times 10^{-12}$ to $10 \times 10^{-9}$   | $1.0 \times 10^{-12}$      | Shufeng et al., 2010  |
| CdS/PPy                              | EIS                         | $3.7 \times 10^{-9}$ to $3.7 \times 10^{-7}$   | $1.0 \times 10^{-9}$       | Peng et al., 2006     |
| PDDA/PDC-SWNT                        | DPV                         | $1.0 \times 10^{-11}$ to $1.0 \times 10^{-6}$  | $2.6 \times 10^{-12}$      | Yang et al., 2008     |
| Ag NP/MWCNTs                         | DPV                         | $3.2 \times 10^{-12}$ to $5.3 \times 10^{-9}$  | $6.4 \times 10^{-13}$      | Shuyan et al., 2009   |
| SiO <sub>2</sub> NP/PATP             | EIS                         | $1.0 \times 10^{-11}$ to $1.0 \times 10^{-6}$  | $1.5 \times 10^{-12}$      | Yao et al., 2008      |
| Chitosan and Au NP                   | DPV                         | $1.0 \times 10^{-10}$ to $5.0 \times 10^{-9}$  | $5.0 \times 10^{-11}$      | Hong et al., 2002     |
| Au NP /MWCNT                         | DPV                         | $5.0 \times 10^{-10}$ to $1.0 \times 10^{-11}$ | $6.2 \times 10^{-12}$      | Yuzhong et al., 2009  |
| Au NP /PPy/MWCNT                     | DPV                         | $5.0 \times 10^{-12}$ to $1.0 \times 10^{-9}$  | $4.3 \times 10^{-13}$      | Liu et al., 2011      |
| Au NP/PANi-PPy                       | EIS                         | $1.0 \times 10^{-12}$ to $1.0 \times 10^{-6}$  | $1.0 \times 10^{-13}$      | Wilson et al., 2012   |
| PPy-PANi                             | DPV                         | $1.0 \times 10^{-13}$ to $1.0 \times 10^{-9}$  | $5.0 \times 10^{-14}$      | This work             |

reported literatures

Abbreviations: NP - Nanoparticles; PPAA - Poly(trans-3-(3-pyridyl) acrylic acid); PANi - Polyaniline; PLL – Poly(L-lysine); HDT-Hexanedithiol; PPy-Polypyrrole; PDDA-poly(diallyldimethyl ammonium chloride) ; PDC- Pyridinedicarboxylic acid; PATP-p-aminothiophenol.
